# Supplementary material
Source: PubMed Central journal article supplement (PMC6777834)
Supplement: jciinsight-4-126457-s201.pdf [file jciinsight-4-126457-s201.pdf]

**Table S1. Demographic and clinical characteristics of studied population**

|                                       | <b>SLE</b>          | <b>RA</b>          | <b>SS</b>        | <b>HD</b>    |
|---------------------------------------|---------------------|--------------------|------------------|--------------|
|                                       | <i>n</i> =34        | <i>n</i> =29       | <i>n</i> =25     | <i>n</i> =28 |
| <b>Female</b> <i>n</i> (%)            | 32 (94%)            | 27 (93%)           | 23 (92%)         | 26 (93%)     |
| <b>Age</b> mean ± SD                  | 33 ± 10.1           | 39 ± 8.8           | 51 ± 12.0        | 40 ± 11.8    |
| <b>Disease duration</b> (m) mean ± SD | 112 ± 73            | 101 ± 103          | 98 ± 73          |              |
| <b>Prednisone</b> <i>n</i> (%)        | 23 (67%)            | 4 (14%)            | 6 (24%)          |              |
| <b>Antimalarial</b> <i>n</i> (%)      | 23 (67%)            | 15 (52%)           | 7 (28%)          |              |
| <b>Immunosuppressors</b> <i>n</i> (%) | 30 (88%)            | 28 (96%)           | 6 (24%)          |              |
| <b>Disease activity</b> mean ± SD     | SLEDAI<br>4.2 ± 3.3 | DAS28<br>3.2 ± 1.7 | SSDAI<br>2 ± 3.8 |              |

**Abbreviations:** SLE, systemic lupus erythematosus; RA, rheumatoid arthritis; SS, Sjögren's syndrome; HD, healthy donors; SD, standard deviation; m, months; SLEDAI, systemic lupus erythematosus disease activity index (20); DAS28, disease activity score in 28 joints (19); SSDAI, Sjögren's syndrome disease activity index (Vitali C, et al. Sjögren's Syndrome Disease Damage Index and disease activity index: scoring systems for the assessment of disease damage and disease activity in Sjögren's syndrome, derived from an analysis of a cohort of Italian patients. *Arthritis Rheum.* 2007;56(7):2223–2231).

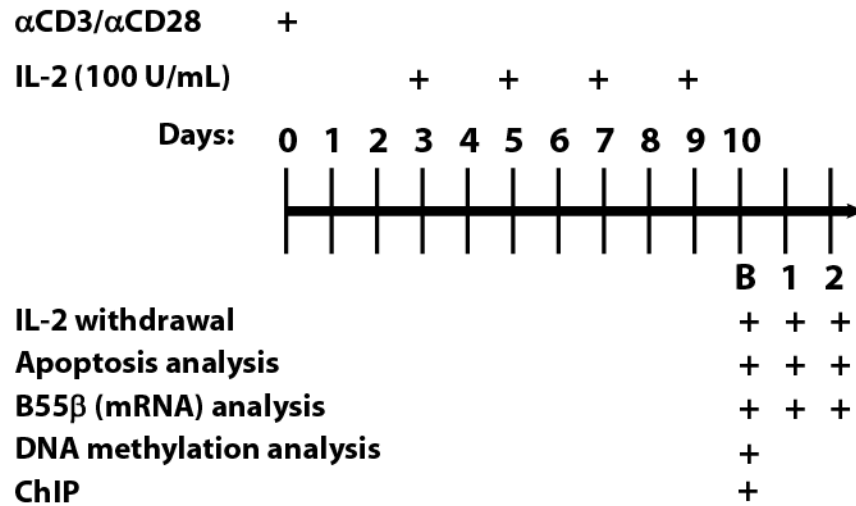

**Figure S1. T cell activation and expansion protocol.** T cells were isolated by negative selection and activated in vitro with plate-bound anti-CD3 (5 μg/mL) and anti-CD28 (5 μg/mL). IL-2 was added at the indicated time points. At Day 10, cells were washed, counted, and replated in fresh RPMI supplemented with 10% FCS. Apoptosis was quantified, RNA and DNA were isolated at the indicated time points.

**Table S2. CAG repeat frequency in HD and patients with SLE and RA**

|                                        | <b>SLE</b>   | <b>RA</b>    | <b>HD</b>    |
|----------------------------------------|--------------|--------------|--------------|
| <b>CAG(<i>n</i>)</b>                   | <i>n</i> =20 | <i>n</i> =20 | <i>n</i> =21 |
| <b>Range</b>                           | 9 - 20       | 9 - 16       | 9 - 17       |
| <b>Mean (SEM)</b>                      | 12.35 (0.42) | 12.45 (0.45) | 13.31 (0.44) |
| <b>Most common allele</b>              | 10           | 10           | 10           |
| <b>Frequency of most common allele</b> | 47.5         | 45           | 47.6         |
| <b><i>P</i> value*</b>                 | >0.999       | 0.444        |              |

\*One way-ANOVA with post hoc Dunn' s test.

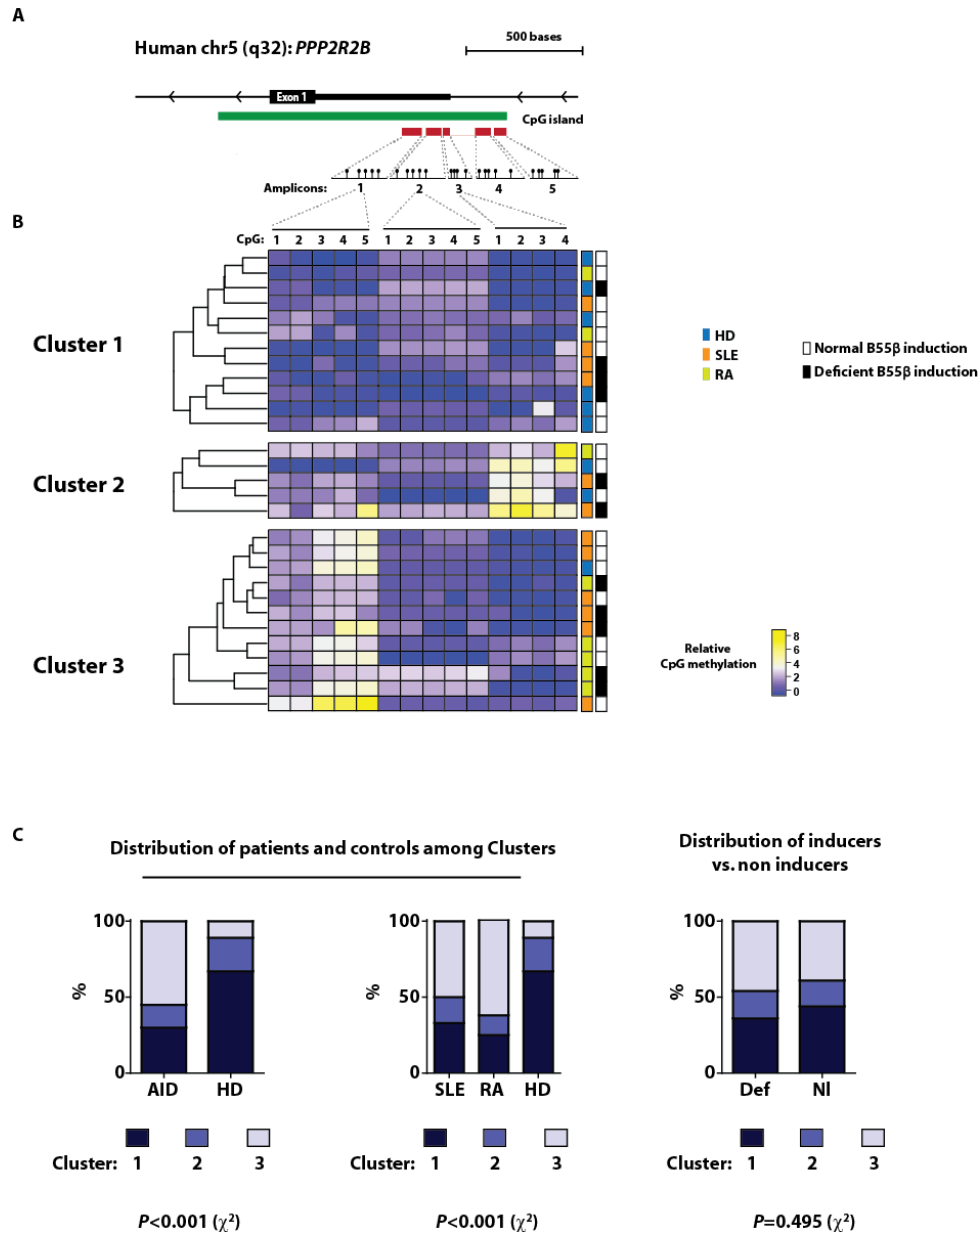

**Figure S2. Methylation of *PPP2R2B* discriminates between HD and patients with AID.** (A) Schematic representation of *PPP2R2B*, indicating the location of the CpG dinucleotides examined by pyrosequencing. (B) Heatmap showing relative methylation (fold change over the mean of HD) of the CpG dinucleotides from Amplicons 1 to 3. Samples were ordered by unsupervised clustering. The colored boxes on the right side of the heatmap indicate whether the sample corresponds to a HD or a patient; the black and white boxes indicate B55 $\beta$  induction after cytokine withdrawal. (C) Segregation of HD and patients, of HD and patients with SLE and RA, and of individuals with normal or defective B55 $\beta$  induction. *P* values were calculated using chi square.

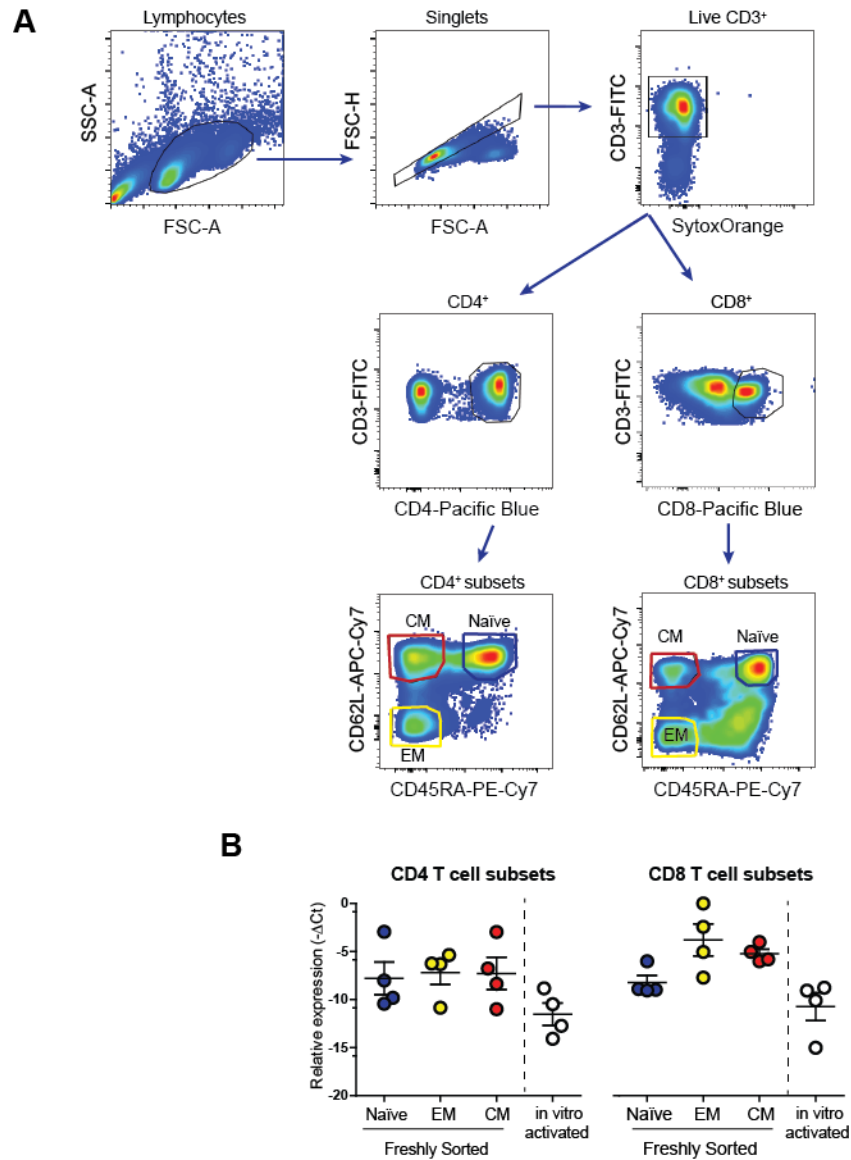

**Figure S3. Levels of *PPP2R2B* in freshly isolated T cell subsets.** The following CD4 and CD8 T cell subsets were sorted from peripheral blood of 4 healthy donors: CD4 naïve ( $CD3^+CD4^+CD45RA^+CD62L^+$ ), CD4 effector memory (EM,  $CD3^+CD4^+CD45RA^-CD62L^-$ ), CD4 central memory (CM,  $CD3^+CD4^+CD45RA^-CD62L^+$ ), CD8 naïve ( $CD3^+CD8^+CD45RA^+CD62L^+$ ), CD8 EM ( $CD3^+CD8^+CD45RA^-CD62L^-$ ), CD8 CM ( $CD3^+CD8^+CD45RA^-CD62L^+$ ), following the gating strategy depicted in (A). (B) Total RNA was isolated from the sorted T cell subsets and *PPP2R2B* mRNA levels were quantified by qPCR. Shown is  $-\Delta Ct$  (normalized with *ACTB*). A fraction of the naïve CD4 and CD8 cells was activated and expanded in vitro (Figure S1) and *PPP2R2B* levels were determined.

**Table S3. Primers used in the study**

| Procedure      | Target                           | Sequence                                                                                                           |
|----------------|----------------------------------|--------------------------------------------------------------------------------------------------------------------|
| qPCR           | <i>PPP2R2B</i>                   | F: 5' -ATCCTGCCACCATCACAAC-3'<br>R: 5' -GCGTTGGCAAATACTCTTCG-3'                                                    |
|                | <i>ACTB</i>                      | F: 5' - ATGATGATATCGCCGCGCTC-3'<br>R: 5' - CCACCATCACGCCCTGG-3'                                                    |
| CAG repeats    | <i>PPP2R2B</i>                   | F: 5'-6-FAM-TGCTGGGAAAGAGTCGTG-3'<br>R: 5'-GCCAGCGCACTCACCCCTC-3'                                                  |
| MS-PCR         | <i>PPP2R2B</i> -<br>methylated   | F: 5' -AGTAGTAGTTGCGAGTGCGC-3'<br>R: 5' -GAACAACCGCGACAAAATAAT-3'                                                  |
|                | <i>PPP2R2B</i> -<br>unmethylated | F: 5' - AGTAGTAGTAGTTGTGAGTGTGT-3'<br>R: 5' -AAACAAACAACCACAACAAAATAATACC-3'                                       |
| Pyrosequencing | <i>PPP2R2B</i> Amp 1             | F: 5' -AGATGGTAGGGATAGGATTTA-3'<br>R: 5' -[Biotin]-CTCCCCTTTAATACACCA-3'<br>Seq F: 5' -GGTAGGGATAGGATTTAG-3'       |
|                | <i>PPP2R2B</i> Amp 2             | F: 5' -GATGGTAGGGATAGGATTTA-3'<br>R: 5' -[Biotin]-CCTCCCCTTTAATACACC-3'<br>Seq F: 5' -AGGAGGGGGTAGGGAA-3'          |
|                | <i>PPP2R2B</i> Amp 3             | F: 5' -ATGAGGGTGTGGTTTTA-3'<br>R: 5' -[Biotin]-AACCTCCCCTTTAATACA-3'<br>Seq F: 5' -TAGAGTATTTATTTTTATATTTA-3'      |
|                | <i>PPP2R2B</i> Amp 4             | F: 5' -AGGAGGTTGGTGTATTAAG-3'<br>R: 5' -[Biotin]-TTCCACCTAACCTACAAAC-3'<br>Seq F: 5' -TTTTGTTGTAGTGGG-3'           |
|                | <i>PPP2R2B</i> Amp 5             | F: 5' -GAATAGGTATTTGGGTAGTAAG-3'<br>R: 5' -[Biotin]-AAAACCTACTTCTCTTTACTATTC-3'<br>Seq F: 5' - TGTAGGTTTAGGTGGA-3' |
| ChIP           | <i>CTCF</i> positive<br>control  | F: 5' -TGTGGATAATGCCCCGACCTGAAGATCTG-3'<br>R: 5' -ACGGAATTGGTTGTAGTTGTGGAATCGGAAGT-3'                              |
|                | <i>PPP2R2B</i> Amp 1             | F: 5' -GTGTGGGTGTGAGGGTGAGT-3'<br>R: 5' - AAAATGGTGCCTTTCTGGAC-3'                                                  |
